# Supplementary material
Source: ML conference proceedings conference paper supplement (https://proceedings.mlr.press/v130/wu21c.html)
Supplement: Supplementary file 1 [file wu21c-supp.pdf]

---

# Supplementary Materials for "Prediction with Finitely many Errors Almost Surely"

---

## 1 Omitted proofs in Example 1 and Example 2

We first introduce the following lemma, which is due to LeCam (1973).

**Lemma 1** (Le Cam's Two Point Theorem). *Let  $p_0, p_1$  be two distributions over the same probability space  $\mathcal{X}$ . Then for any estimator  $\Phi : \mathcal{X} \rightarrow \{0, 1\}$  we have*

$$\max_{i \in \{0, 1\}} \Pr_{X \sim p_i}(\Phi(X) \neq i) \geq \frac{1 - \|p_0 - p_1\|_{TV}}{2},$$

where  $\|\cdot\|_{TV}$  denotes for total variation.

**Proof of the sufficiency part in Example 1:**

Let  $\mathcal{P}$  be the class of all random processes over  $\{0, 1\}^\infty$  such that for any  $p \in \mathcal{P}$  there exists a parameter  $b \in \{0, 1\}$  and strictly monotonically increasing integer sequence  $M_1, M_2, \dots$  with  $M_1 = 1$  satisfying for all  $n \geq 1$ ,  $X_{M_n} = X_{M_{n+2}} = \dots = X_{M_{n+1}-1}$ , and  $X_{M_n}^{M_{n+1}-1}$  is independent of all other random variables in the process, and

$$p(X_{M_n} = b) = 1 - \frac{1}{(n+1)^2}.$$

Note that a process in  $\mathcal{P}$  is purely determined by the parameter  $b$  and sequence  $\{M_n\}_{n \geq 1}$ . We will denote a process to be  $p_b$  if the parameter is  $b$ . Clearly, by Borel-Cantelli lemma  $\mathcal{P}$  is *e.a.s.*-predictable under the loss  $\ell$  in Example 1 by predicting  $X_{n-1}$  at each step  $n$ . We now show that there is no nesting  $\{\mathcal{P}_i, i \geq 1\}$  of  $\mathcal{P}$  such that  $(\mathcal{P}_i, \ell)$  is  $\eta$ -predictable for all  $\eta > 0$  and  $i \geq 1$ . Our approach is a proof by contradiction—should such a decomposition exist, we construct a distribution in  $\mathcal{P}$  that is not in  $\bigcup_{i \geq 1} \mathcal{P}_i$ , a contradiction on our supposition that  $\mathcal{P} = \bigcup_{i \geq 1} \mathcal{P}_i$ .

Let  $R_n$  be a number such that the class  $\mathcal{P}_n$  is  $\eta_n$ -predictable with a sample of size  $R_n$ , where  $\eta_n$  will be determined later. Wolog, we may assume  $R_n$  to be strictly increasing on  $n$ . Let  $p_0, p_1$  be two distributions in  $\mathcal{P}$  that are associated with the sequence  $M_1 = 1$  and  $(M_n = R_{n-1} + 1)_{n \geq 2}$  with parameter  $b = 0$  and  $b = 1$  respectively, i.e.  $p_0, p_1$  share the same partition of independent blocks but with different parameter.

Let  $\|p_0^{R_n} - p_1^{R_n}\|_{TV} = 1 - \epsilon_n$ , where  $p_i^{R_n}$  is the distribution of  $p_i$  on the first length- $R_n$  binary strings. Observe that the probability of any length- $R_n$  binary string under either  $p_0$  or  $p_1$  is purely a function of the number of blocks which are all-0 (or equivalently all-1), and therefore, so is  $\epsilon_n$ , the total variation distance. Hence  $\epsilon_n$  does not depend on the sequence  $R_n$ , or  $\eta_n$ , and in particular we can choose  $\eta_n < \frac{\epsilon_n}{2}$ .

By Lemma 1, we know that any prediction rule will make error with probability at least  $\frac{\epsilon_n}{2}$  on either  $p_0$  or  $p_1$  at time step  $R_n + 1$  if they both belong to  $\mathcal{P}_n$ . Since  $\epsilon_n/2 > \eta_n$ , we conclude that at least one of  $p_0$  or  $p_1$  cannot be in  $\mathcal{P}_n$ , and that the above conclusion works for all  $n$ .

But  $\mathcal{P}_n \subset \mathcal{P}_m$  for all  $m \geq n$ . Let  $n$  be the smallest number that contains one of  $p_0$  or  $p_1$ .  $\mathcal{P}_n$  cannot contain both, per the argument above, it follows that  $\mathcal{P}_m$  contains that distribution for all  $m \geq n$ . However, the argument above implies that the distribution missing from  $\mathcal{P}_n$  cannot be in  $\bigcup_{k \geq 1} \mathcal{P}_k$ , contradicting the assumption that  $\{\mathcal{P}_i, i \geq 1\}$  is a nesting of  $\mathcal{P}$ .

**The following lemmas are used in Example 2:**

**Lemma 2.** Let  $\mathcal{B}_k$  be the set of all Bernoulli processes with parameters in

$$\mathcal{S}_k = \{r_1, \dots, r_k\} \cup \left( [0, 1] \setminus \bigcup_{i=1}^{\infty} B(r_i, \frac{1}{k2^i}) \right)$$

where  $B(r_i, \frac{1}{k2^i})$  is the open balls centered at  $r_i$  with radius  $\frac{1}{k2^i}$ ,  $r_1, r_2, \dots$  is an arbitrary enumeration of rational numbers in  $[0, 1]$ . Then  $\mathcal{B}_k$  is  $\eta$ -predictable with irrationality loss for any  $k \geq 1$  and  $\eta > 0$ .

*Proof.* We show that for any  $k \in \mathbb{N}$  and  $\eta > 0$ , there exists  $b_\eta$  such that  $\mathcal{B}_k$  is  $\eta$ -predictable with sample size  $b_\eta$ . Let  $X_1, \dots, X_n$  be an *i.i.d.* sample from some  $p \in \mathcal{B}_k$  with  $\mathbb{E}[X_i] = \mu$  and  $\bar{X} = \frac{X_1 + \dots + X_n}{n}$ . We have  $\text{Var}[X_i] \leq 1$ . Chebyshev's inequality then shows that

$$p(|\bar{X} - \mu| \geq \epsilon) \leq \frac{1}{n\epsilon^2}.$$

Fix  $\epsilon = \frac{1}{k2^{k+1}}$ . Let  $b_\eta$  be a number large enough so that  $\frac{1}{b_\eta\epsilon^2} < \eta$ . Therefore for  $n > b_\eta$ ,  $p(|\bar{X} - \mu| \geq \epsilon)$  is less than  $\eta$ . Thus, we can conclude that  $\mathcal{B}_k$  is  $\eta$ -predictable by simply predicting the irrationality of element in  $\mathcal{S}_k$  that is closest to  $\bar{X}$  at step  $b_\eta$ , retaining the prediction perpetually thereafter.  $\square$

**Lemma 3.** Let  $\mathcal{B}$  be a class of Bernoulli processes with parameters in  $\mathcal{S}$ , if  $\mathcal{B}$  is  $\eta$ -predictable w.r.t. the irrationality loss for some  $0 < \eta < \frac{1}{2}$ , then

$$\inf\{|x - r| : x, r \in \mathcal{S} \text{ and } r \in \mathbb{Q}, x \in [0, 1] \setminus \mathbb{Q}\} > 0. \quad (1)$$

*Proof.* By definition of  $\eta$ -predictability, there exists a number  $N_\eta$  and prediction rule  $\Phi_\eta$  such that  $\Phi_\eta$  makes no errors after step  $N_\eta$  with probability at least  $1 - \eta$  for all  $p \in \mathcal{B}$ . Suppose, otherwise, that the infimum in equation (1) is 0. We now select two sources  $p_0, p_1$  from  $\mathcal{B}$  with parameters  $b_0, b_1$  respectively, such that  $b_0$  is rational and  $b_1$  is irrational and  $|b_0 - b_1| < \frac{1-2\eta}{2N_\eta}$ .

We now have  $\|p_0^{N_\eta} - p_1^{N_\eta}\|_{TV} < 1 - 2\eta$ , where  $p_i^{N_\eta}$  is the distribution of  $p_i$  restricted to the first  $N_\eta$  samples—using the fact that  $\|p^N - q^N\|_{TV} \leq N\|p - q\|_{TV}$  for any distributions  $p, q$  with  $N$ -fold *i.i.d.* distributions  $p^N, q^N$ . Now, by Lemma 1, any prediction rule (in particular  $\Phi_\eta$ ) will make an error at time step  $N_\eta + 1$  with probability  $> \eta$  for either  $p_0$  or  $p_1$ . This contradicts  $\eta$  predictability of  $\Phi_\eta$  on  $\mathcal{B}$ .  $\square$

**Lemma 4.** Let  $\mathcal{S}_1 \subset \mathcal{S}_2 \subset \dots \subset \mathcal{S}_k \subset \dots \subset [0, 1]$  be countably many sets, such that

$$\forall k, \inf\{|x - r| : x, r \in \mathcal{S}_k \text{ and } r \in \mathbb{Q}, x \in [0, 1] \setminus \mathbb{Q}\} > 0. \quad (2)$$

If  $\bigcup_{k \in \mathbb{N}} \mathcal{S}_k$  contains all rational numbers in  $[0, 1]$ , then the irrational numbers in  $\mathcal{S}_k$  are nowhere dense in  $[0, 1]$  for all  $k$ .

*Proof.* Suppose otherwise, the set of irrational numbers  $\mathcal{I}_k$  in  $\mathcal{S}_k$  is not nowhere dense. By definition, there exists an interval  $[a, b] \subset \text{col}(\mathcal{I}_k)$ , where  $\text{col}$  denotes for closure. Since the rational numbers in  $[0, 1]$  are dense, there exists some rational number  $r \in [a, b]$ , and therefore  $r \in \text{col}(\mathcal{I}_k)$ . Since  $r \in \bigcup_{k \in \mathbb{N}^+} \mathcal{S}_k$ , there exist some  $k' \geq k$  such that  $r \in \mathcal{S}_{k'}$ . However, we also have  $\mathcal{S}_k \subset \mathcal{S}_{k'}$ . Which implies that  $r$  is the limit point of irrational numbers in  $\mathcal{S}_{k'}$ , contradicting the assumption (2).  $\square$

## 2 Proof of Theorem 4

Suppose  $(\mathcal{P}, \ell)$  is e.a.s.-learnable. Then for each  $i$ , we let  $\Phi_i$  and  $\tau_i$  be the predictor and stopping rule pair respectively that learns with confidence  $1/2^i$ . By definition, we have that the probability  $\Phi_i$  makes an error after  $\tau_i$  stops (i.e.  $\tau_i = 1$ ) is  $\leq \frac{1}{2^i}$ . Let  $\Phi_0$  be an arbitrary predictor.

Now, there are countably many stopping rules (one for each natural number  $i \geq 0$ ) and each such rule stops at a finite time with probability 1, we conclude that with probability 1 all of them would have stopped simultaneously at some finite time by a union bound.

We initialize  $t = 1$  ( $t$  will stand for the stage). As we see more of the sample, at any stage  $t$ , we predict using the prediction rule  $\Phi_{t-1}$ , till  $\tau_t$  halts (i.e.  $\tau_t = 1$ ). At that point, we move to stage  $t + 1$ . For  $t \geq 2$ , the probability of making an error in stage  $t$  is  $\leq 2^{-t}$ . Invoking the Borel-Cantelli lemma, we conclude that we make an error in finitely many stages almost surely, and the Theorem follows.

### 3 Proof of Corollary 1

We show that the open conjecture posed in (Dembo and Peres, 1994) is true if we assume some uniform bounds on the density. Let  $H_0, H_1$  be disjoint sets of distributions over  $\mathbb{R}^d$ . The problem is to predict whether an underlying distribution  $p \in H_0 \cup H_1$  is in  $H_0$  or  $H_1$ , using *i.i.d.* samples from  $p$ . Therefore the class  $\mathcal{H}$  will be the *i.i.d.* processes with marginals in  $\mathcal{H}_0 \cup \mathcal{H}_1$ , our prediction on seeing an sample  $X^n$  of size  $n$  is  $Y_n(X_n) \in \{0, 1\}$ , and the loss is  $\ell(p, X_1^n, Y_n) = 1\{p \notin \mathcal{H}_{Y_n}\}$ .

For any distributions  $p_1, p_2$  over  $\mathbb{R}^d$ , we consider the Kolmogorov-Smirnov distance (abbreviate as KS-distance)

$$|p_1 - p_2|_\infty = \sup_{\mathbf{x} \in \mathbb{R}^d} |F_{p_1}(\mathbf{x}) - F_{p_2}(\mathbf{x})|,$$

where  $F_{p_i}$  is the CDF of  $p_i$ . The following lemma is well known in the literature, see e.g. (Athreya and Lahiri, 2006, Theorem 9.1.4).

**Lemma 5** (Polya's Theorem). *Let  $p_1, p_2, \dots$  and  $p$  be distributions over  $\mathbb{R}^d$  with continuous CDF. Then  $\lim_{n \rightarrow \infty} |p_n - p|_\infty = 0$  iff  $p_n$  weakly converges (converges in distribution) to  $p$ .*

For any  $\mathbf{x} \in \mathbb{R}^d$ , we denote  $\mathbb{I}_{\mathbf{x}}$  be the indicator function of set  $\prod_{i=1}^d (-\infty, \mathbf{x}_i]$ , where  $\mathbf{x}_i$  is the  $i$ 'th coordinate of  $\mathbf{x}$ . Let  $X_1, X_2, \dots, X_n$  be *i.i.d.* distributions over  $\mathbb{R}^d$ , denote the CDF of the empirical distribution as follows

$$\forall \mathbf{x} \in \mathbb{R}^d, F_n(\mathbf{x}) = \frac{1}{n} \sum_{i=1}^n \mathbb{I}_{\mathbf{x}}(X_i).$$

We have the following lemma, which is know as Dvoretzky-Kiefer-Wolfowitz Inequality, see e.g. Massart (1990); Kiefer and Wolfowitz (1958).

**Lemma 6** (Dvoretzky-Kiefer-Wolfowitz Inequality). *Let  $X_1, X_2, \dots, X_n$  be i.i.d. samples of distributions  $p$  over  $\mathbb{R}^d$ ,  $F_n(\mathbf{x})$  is the CDF of the empirical distribution. Then there exist an constant  $C_d$  depends only on  $d$  such that*

$$p(|F_n(\mathbf{x}) - F_p(\mathbf{x})|_\infty \geq \epsilon) \leq C_d \exp(-n\epsilon^2).$$

Note that the tail bound given in Lemma 6 only depends on the sample size and is independent of the underlying distribution. We now provide the following theorem, which provide an alternative proof of Theorem 2(i) in Dembo and Peres (1994). We first introduce the following notion, which is equivalent to the  $F_\sigma$ -separability introduced in (Dembo and Peres, 1994), but with a more operational interpretation.

**Definition 1.** *Let  $A, B$  be two disjoint sets in a metric space with metric  $d$ . We say  $A, B$  are  $F_\sigma$ -separable if there exist nesting  $A_1 \subset A_2 \subset \dots \subset A$  and  $B_1 \subset B_2 \subset \dots \subset B$  such that*

1.  $\bigcup_{n \geq 1} A_n = A$  and  $\bigcup_{n \geq 1} B_n = B$ .

2. For all  $n \geq 1$ , we have

$$\inf\{d(x, y) : x \in A_n, y \in B_n\} > 0.$$

**Theorem 1.** *Let  $H_0, H_1 \subset \mathcal{M}_1(\mathbb{R}^d)$  be collections of distributions over  $\mathbb{R}^d$  that is  $F_\sigma$ -separable under KS-distance. Then  $(\mathcal{H}, \ell)$  is e.a.s.-predictable.*

*Proof.* By definition of  $F_\sigma$  separability, we have nesting  $\{A_n\}, \{B_n\}$  of  $H_0, H_1$  respectively, such that

$$\forall n \in \mathbb{N}, \epsilon_n \stackrel{\text{def}}{=} \inf\{|p_0 - p_1|_\infty : p_0 \in A_n, p_1 \in B_n\} > 0.$$

We only need to show that  $A_n \cup B_n$  is  $\eta$ -predictable for all  $\eta$  by Theorem 2 (in the main paper). By Lemma 6, we can simultaneously make  $|F_n - F_p|_\infty \leq \epsilon_n/4$  with confidence  $1 - \eta$  for all  $p \in A_n \cup B_n$  by choosing the sample size large enough. By triangle inequality of KS-distance, one can classify the distributions in  $A_n \cup B_n$  successfully with probability at least  $1 - \eta$ .  $\square$

A collection  $\mathcal{H}$  of distributions over  $\mathbb{R}^d$  with density functions is said to be *uniformly bounded* if for all  $\epsilon > 0$ , there exist a number  $M_\epsilon$  such that

$$\forall p \in \mathcal{H}, p(f_p(\mathbf{x}) \geq M_\epsilon) \leq \epsilon,$$

where  $f_p$  is the density function of  $p$ . We have the following theorem

**Theorem 2.** *Let  $H_0, H_1$  be collections of distributions that are absolutely continuous w.r.t. Lebesgue measure on  $\mathbb{R}^d$ , and  $H_0 \cup H_1$  is uniformly bounded. Then  $(\mathcal{H}, \ell)$  is e.a.s.-predictable, only if  $H_0, H_1$  is  $F_\sigma$ -separable with KS-distance.*

*Proof.* By Theorem 2 (in the main paper), there exist nesting  $\{A_n\}, \{B_n\}$  of  $H_0, H_1$  respectively, such that  $A_n \cup B_n$  is  $\frac{1}{8}$ -predictable. We show that there is no limit point of  $A_n$  in  $B_n$  or vice versa. Suppose otherwise, there exist  $p_1, p_2, \dots \subset A_n$  and  $p \in B_n$ , such that  $|p_n - p|_\infty \rightarrow 0$ . Let  $\Phi$  be an arbitrary predictor that achieves  $\frac{1}{8}$ -predictability of  $A_n \cup B_n$  with sample size  $n$ . Let  $\Phi^n$  be the prediction function at step  $n$ . By Lemma 5,  $p_n$  weakly converges to  $p$ . Therefore, there exists a compact set  $S$ , such that  $p(S) \geq \frac{7}{8}$  and  $p_n(S) \geq \frac{7}{8}$  for all  $n \in \mathbb{N}$ . By uniform boundedness of  $H_0 \cup H_1$ , there exists a number  $M$ , such that

$$\forall p \in H_0 \cup H_1, p(f_p(x) \geq M) \leq \frac{1}{16}. \quad (3)$$

By Lusin's theorem, there exists a continuous function  $g$  and a set  $E \subset S$ , such that  $\sup_{\mathbf{x} \in E} |\Phi^n(\mathbf{x}) - g(\mathbf{x})| \leq \frac{1}{4}$  and  $m(S \setminus E) \leq \frac{1}{16M}$ , where  $m(\cdot)$  is Lebesgue measure. Let  $\Omega = \{\mathbf{x} : g(\mathbf{x}) > \frac{1}{3}\}$ , we have  $\Omega$  is open and  $\{\mathbf{x} \in E : \Phi^n(\mathbf{x}) = 1\} \subset \Omega$ . By (3) and because  $m(S \setminus E) \leq \frac{1}{8M}$ , we have  $p(S \setminus E) \leq \frac{1}{8}$  and  $p_n(S \setminus E) \leq \frac{1}{8}$  for all  $n \in \mathbb{N}$ . By  $\frac{1}{8}$ -predictability, we have  $p(\Omega \cap E) \geq \frac{7}{8} - \frac{1}{4} = \frac{5}{8}$ . By weak convergence, we have  $\liminf p_n(\Omega) \geq p(\Omega)$ , since  $\Omega$  is open. There exist some  $p_n$  such that  $p_n(\Omega) \geq \frac{1}{2}$  since  $p(\Omega) \geq \frac{5}{8}$ , which implies  $p_n(\Omega \cap E) \geq \frac{1}{2} - \frac{1}{4} = \frac{1}{4} > \frac{1}{8}$ . Contradicting the  $\frac{1}{8}$ -predictability.  $\square$

We have the following corollary.

**Corollary 1** (Corollary 1 in the main paper). *Let  $G : \mathbb{R}^+ \rightarrow \mathbb{R}^+$  be a strictly monotone increasing function such that  $\lim_{x \rightarrow \infty} G(x) \rightarrow \infty$ ,  $H_0, H_1$  be collections of distributions over  $\mathbb{R}^d$  that is continuous w.r.t. Lebesgue measure. Suppose for all  $p \in H_0 \cup H_1$ , we have  $\mathbb{E}_{X \sim p}[G(f_p(X))] < \infty$ . Then  $(\mathcal{H}, \ell)$  is e.a.s.-predictable iff  $H_0, H_1$  are  $F_\sigma$ -separable with KS-distance.*

*Proof.* By breaking  $H_0 \cup H_1$  into countably many subcollections, one may assume  $\forall p \in H_0 \cup H_1, \mathbb{E}_{\mathbf{x} \sim p}[G(f_p(\mathbf{x}))] \leq M$  for some constant  $M$ . We only need to show that  $H_0 \cup H_1$  is uniformly bounded. For any  $p \in H_0 \cup H_1$ , define random variable  $Y_p = G(f_p(\mathbf{x}))$ . We have by Markov inequality  $p(Y_p \geq T) \leq \frac{M}{T}$ . Note that the probability is independent of  $p$ . By letting  $T = \frac{M}{\epsilon}$ , one can make the probability less than  $\epsilon$ . Since  $G$  is monotone increasing and goes to infinity, it is invertible on  $\mathbb{R}^+$ . We now have  $p(f_p(\mathbf{x}) \geq G^{-1}(M/\epsilon)) \leq \epsilon$  for all  $p \in H_0 \cup H_1$  and  $\epsilon > 0$ .  $\square$

**Remark 1.** *Note that, the condition of Theorem 2(ii) of Dembo and Peres (1994) is equivalent to take  $G(x) = x^{q-1}$  for some  $q > 1$ .*

## References

- Krishna B Athreya and Soumendra N Lahiri. *Measure theory and probability theory*. Springer Science & Business Media, 2006.
- Amir Dembo and Yuval Peres. A topological criterion for hypothesis testing. *Annals of Statistics*, pages 106–117, 1994.
- J Kiefer and J Wolfowitz. On the deviations of the empiric distribution function of vector chance variables. *Transactions of the American Mathematical Society*, 87(1):173–186, 1958.
- Lucien LeCam. Convergence of estimates under dimensionality restrictions. *The Annals of Statistics*, 1(1): 38–53, 1973.
- Pascal Massart. The tight constant in the dvoretzky-kiefer-wolfowitz inequality. *The annals of Probability*, pages 1269–1283, 1990.
